# Supplementary material
Source: PubMed Central journal article supplement (PMC6319305)
Supplement: mmc1.pdf [file mmc1.pdf]

**YMTHE, Volume 27**

## **Supplemental Information**

### **miR-212/132 Cluster Modulation Prevents**

### **Doxorubicin-Mediated Atrophy and Cardiotoxicity**

**Shashi Kumar Gupta, Ankita Garg, Petros Avramopoulos, Stefan Engelhardt, Katrin Streckfuss-Bömeke, Sandor Batkai, and Thomas Thum**

Supplementary Figure 1

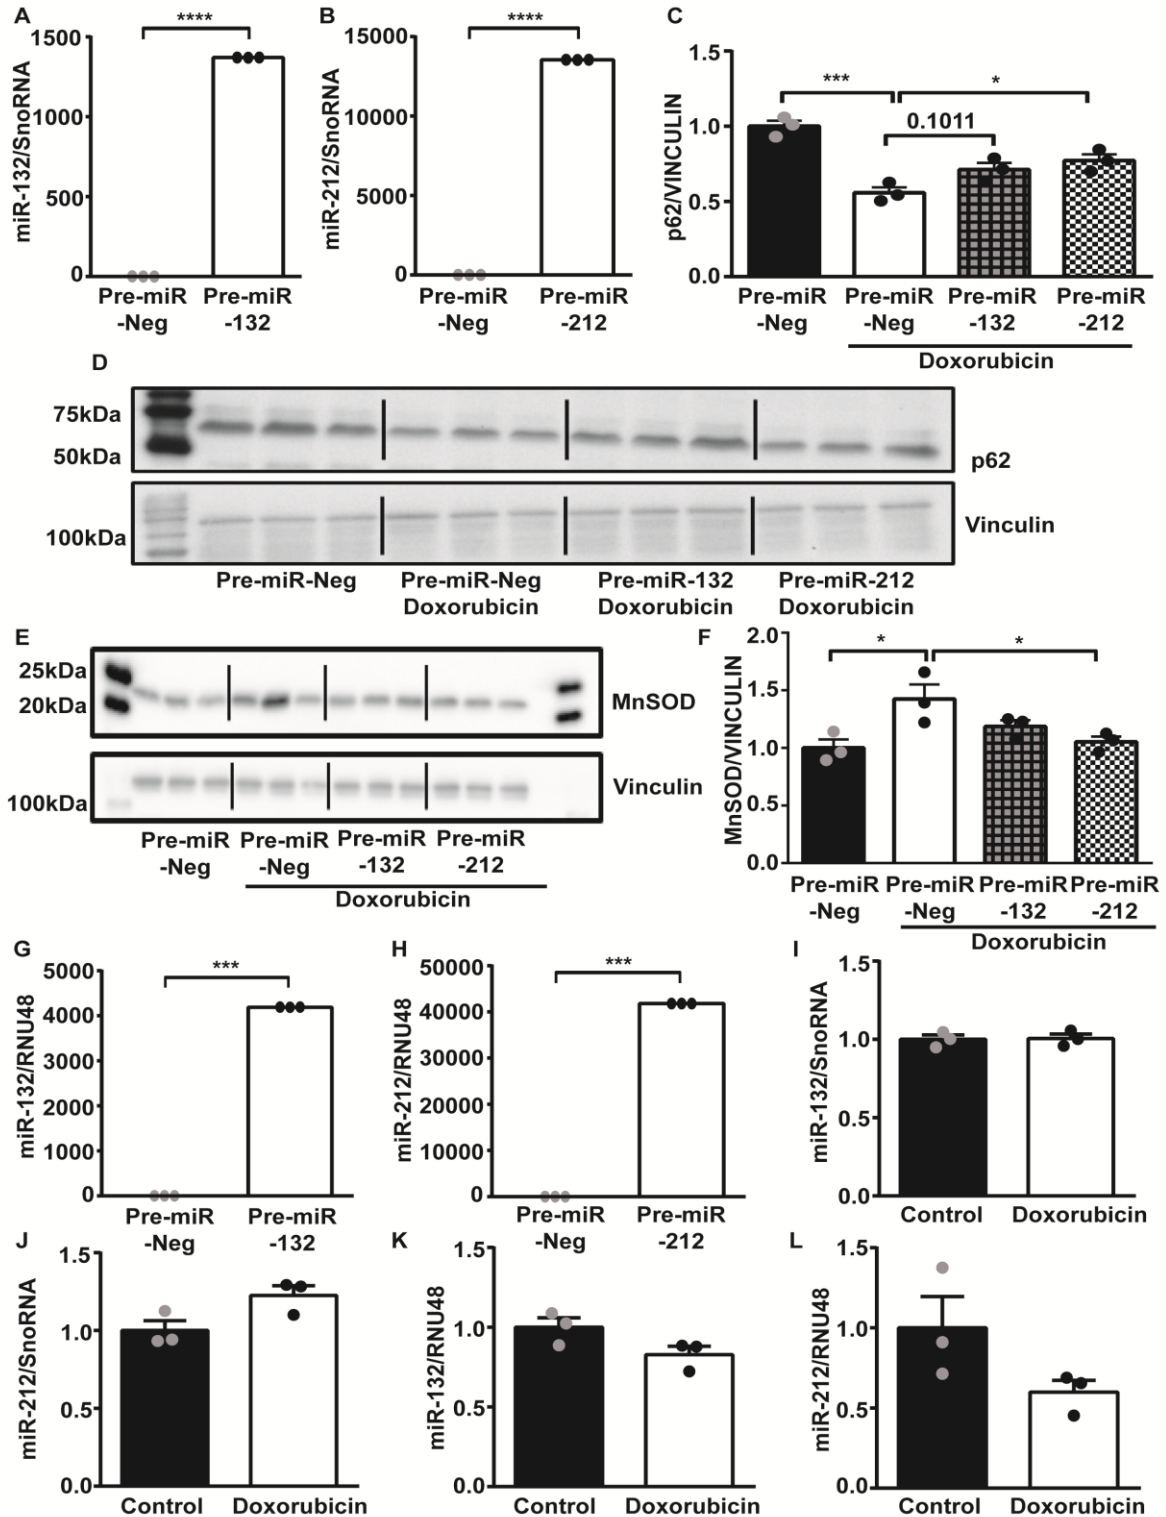

**Supplementary Figure 1.** Expression levels of miR-132 (A) and miR-212 (B) after Pre-miR transfections in rat primary cardiomyocytes. (C-D) Expression level of autophagic marker p62 in primary rat cardiomyocytes transfected with Pre-miR-212/132 or control. (E-F) Expression level of oxidative stress marker MnSOD in primary rat cardiomyocytes transfected with Pre-miR-212/132 or control. Expression levels of miR-132 (G) and miR-212 (H) after Pre-miR transfections in human iPSC-derived cardiomyocytes. Expression levels of miR-212/132 in response to doxorubicin treatment in primary rat cardiomyocytes (I-J) and hiPSC-derived cardiomyocytes (K-L). \*p<0.05, \*\*p<0.01, \*\*\*p<0.001, \*\*\*\*p<0.0001

Supplementary Figure 2

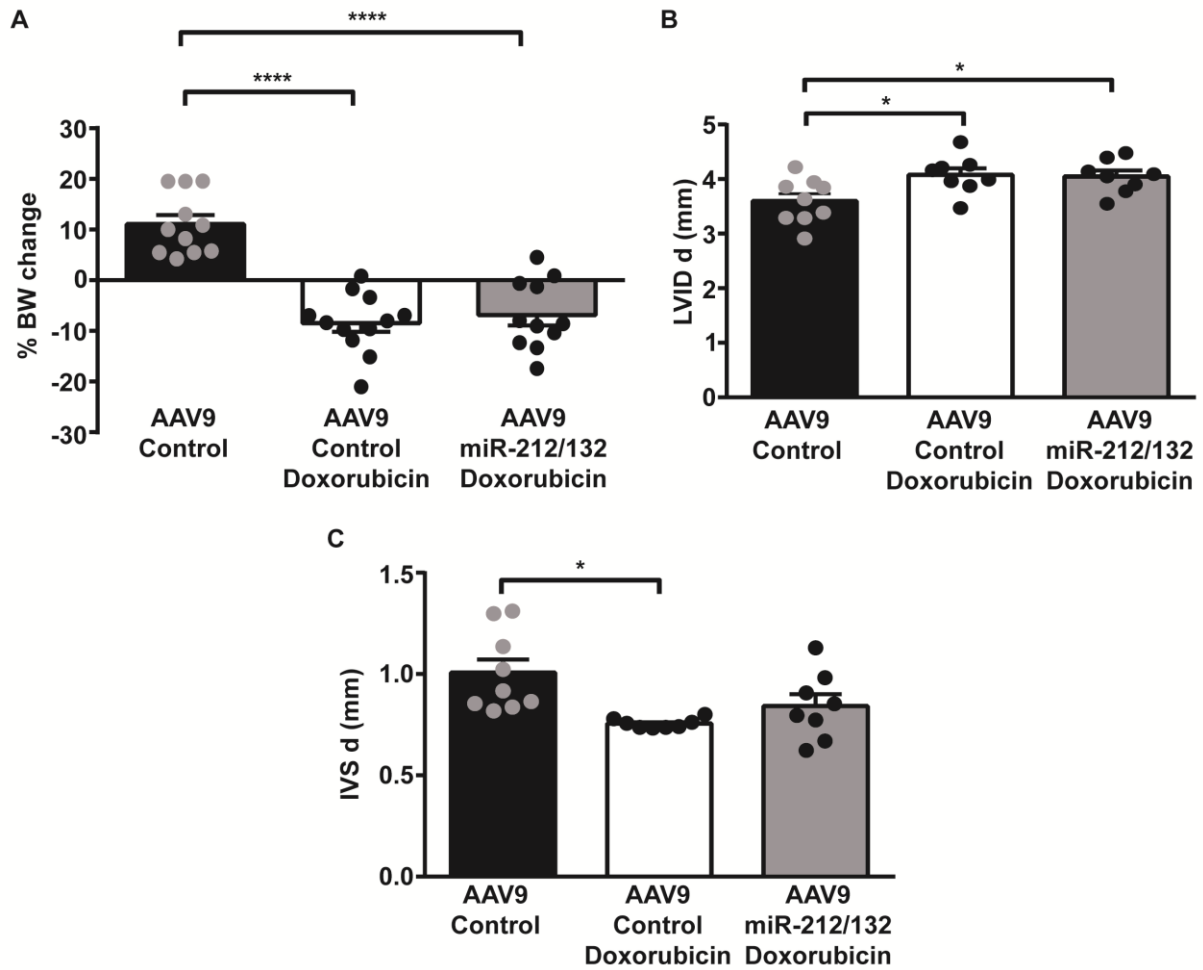

**Supplementary Figure 2.** (A) Percentage body weight changes, (B) Left ventricular internal diameter diastole (LVID d) and (C) interventricular septal thickness diastole (IVS d) in AAV9-Control healthy animals, AAV9-Control doxorubicin treated animals and AAV9-miR-212/132 doxorubicin treated animals. \*p<0.05, \*\*\*\*p<0.0001, BW – body weight, LVID d – Left ventricular internal diameter diastole, IVS d – Interventricular septum diastole

Supplementary Figure 3

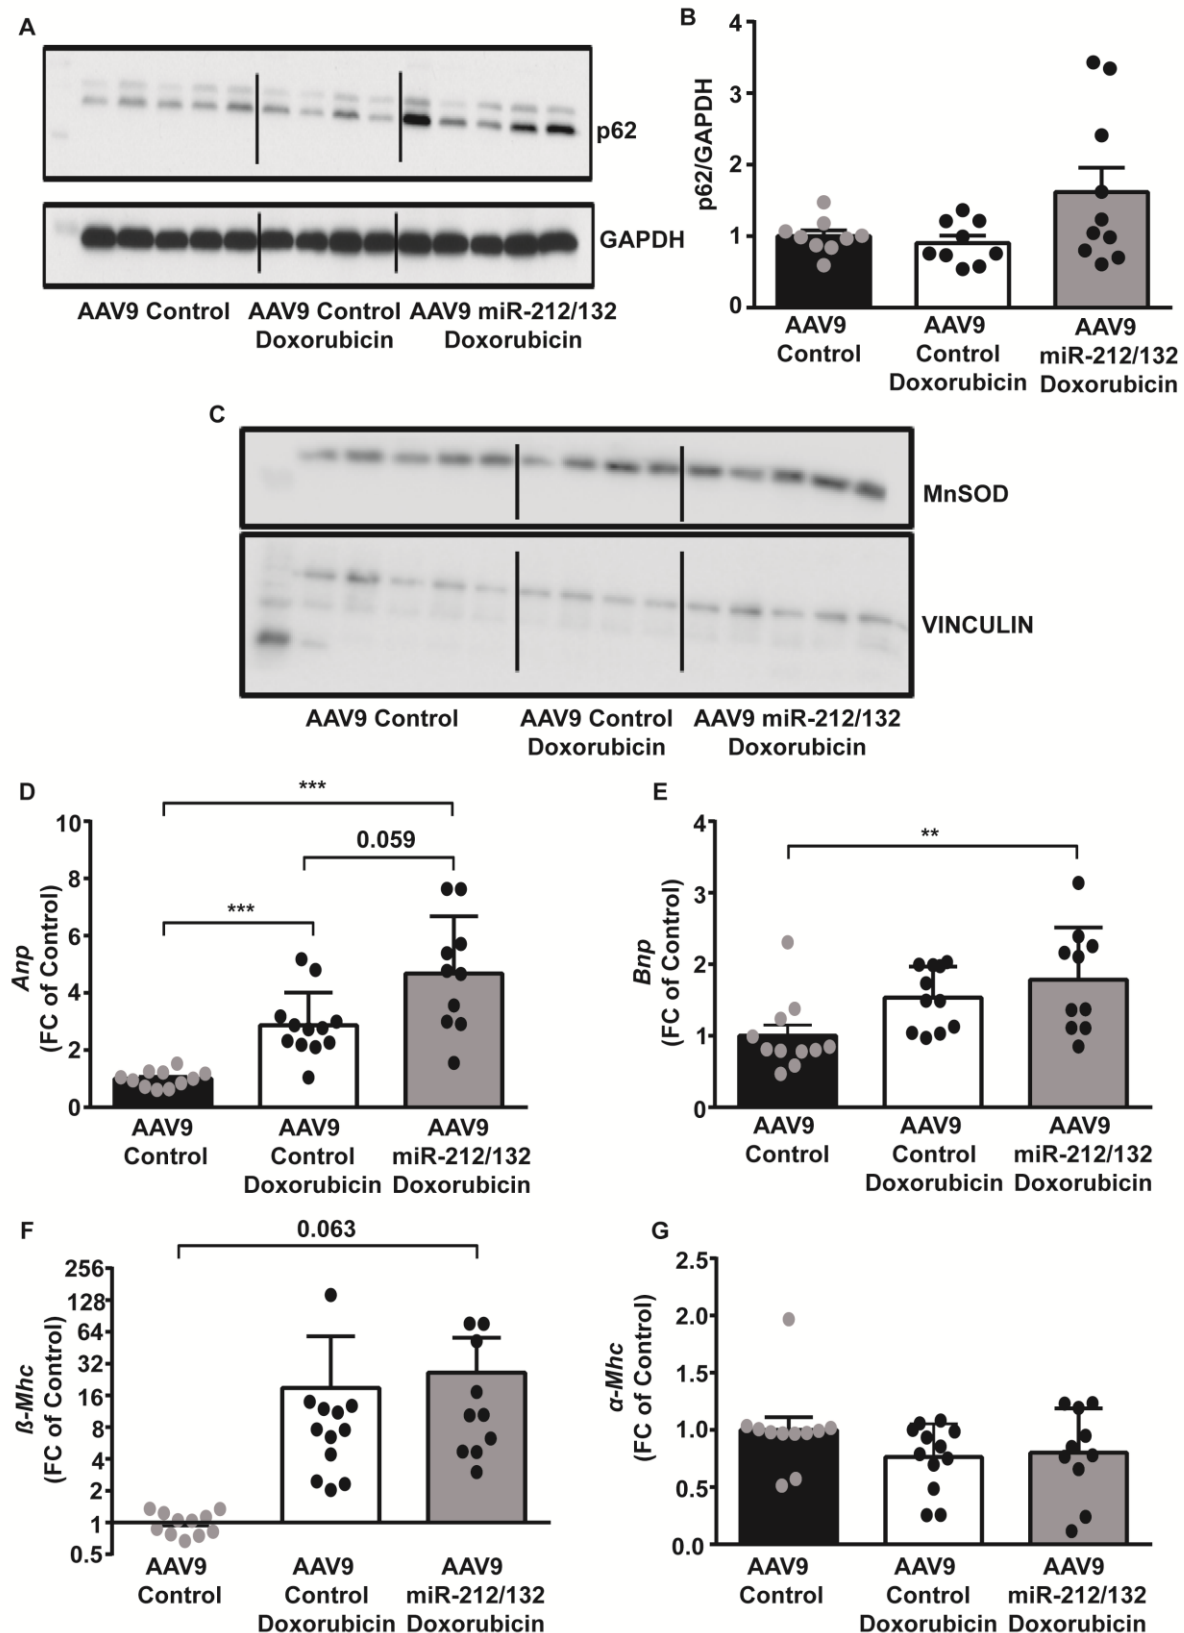

**Supplementary Figure 3.** P62 (A-B) and MnSOD (C) expression in myocardium of AAV9-Control, AAV9-Control treated with doxorubicin and AAV9-miR-212/132 treated with doxorubicin. (D-G) expression levels of cardiac remodeling genes *Anp* (D), *Bnp* (E),  $\beta$ -Mhc (F) and  $\alpha$ -Mhc (G) in AAV9-Control, AAV9-Control treated with doxorubicin and AAV9-miR-212/132 treated with doxorubicin. \* $p < 0.05$ , \*\* $p < 0.01$ , \*\*\* $p < 0.001$ , \*\*\*\* $p < 0.0001$ , FC – fold change

Supplementary Figure 4

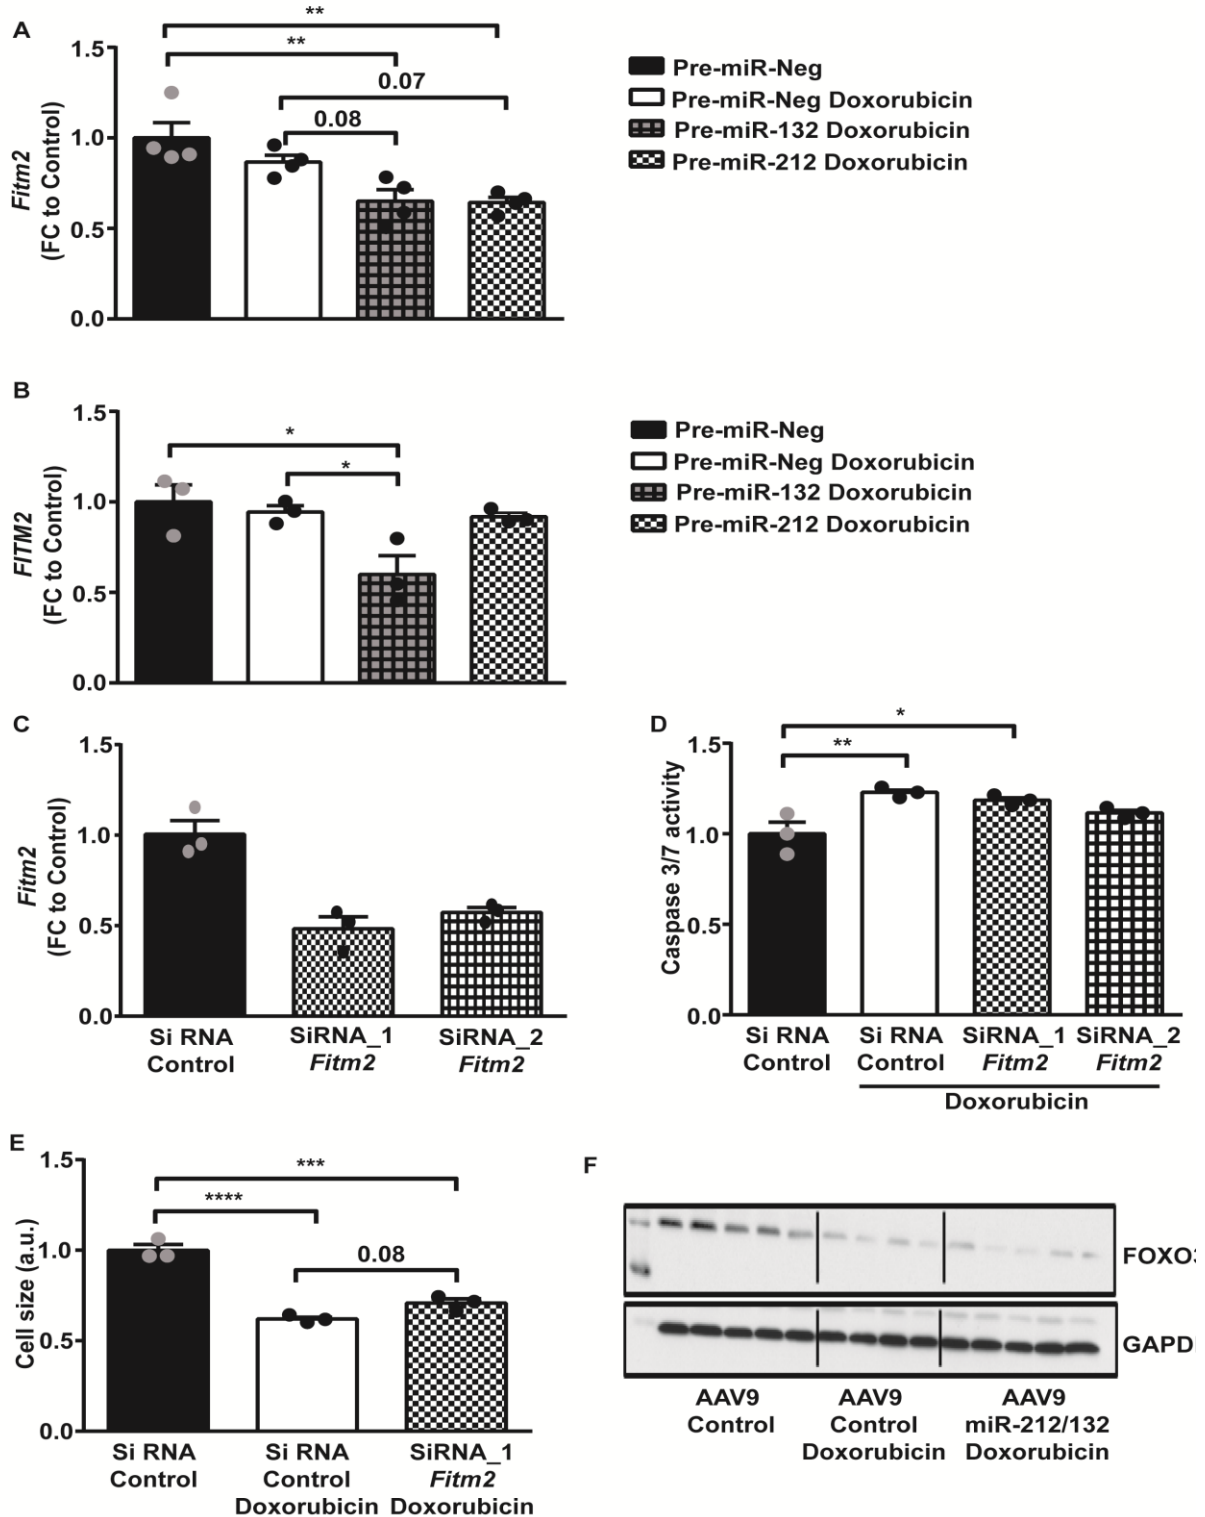

**Supplementary Figure 4.** Expression level of *Fitm2* in primary rat cardiomyocytes (A) and hiPSC-derived cardiomyocytes (B) after overexpression of miR-212/132 and control microRNA together with doxorubicin. (C) *Fitm2* levels after siRNA mediated inhibition in rat primary cardiomyocytes. (D) Caspase 3/7 activity in rat cardiomyocytes after *Fitm2* inhibition in presence of doxorubicin. (E) Primary rat cardiomyocyte cell size after *Fitm2* inhibition in response to doxorubicin compared to control. (F) Expression levels of FOXO3 in hearts of AAV9 Control, AAV9 Control doxorubicin and AAV9-miR-212/132 doxorubicin. \* $p < 0.05$ , \*\* $p < 0.01$ , \*\*\* $p < 0.001$ , \*\*\*\* $p < 0.0001$ , FC – fold change, a.u. – arbitrary unit

| <b>Genes</b>     | <b>Primers</b>                                                                     |
|------------------|------------------------------------------------------------------------------------|
| <i>Rbfox1</i>    | Forward: 5'CGGAGTAGTGTATCAAGAGCCA3'<br>Reverse: 5'CGGTACGCAGCATAACCACC3'           |
| <i>Sgk3</i>      | Forward: 5'CCAGTGAGCTTTGTTGCCAGT3'<br>Reverse: 5'TCAGAGCTGGGAATGCTTACA3'           |
| <i>Socs2</i>     | Forward: 5'GTTGCCGGAGGAACAGTCC3'<br>Reverse:5'ACTCAATCCGCAGGTTAGTCG3'              |
| <i>Fitm2</i>     | Forward: 5'AGCTACCTCAGCAACAAGCG3'<br>Reverse:5'GGTGGTAGTTGGTAAGGGCA3'              |
| <i>L3mbtl3</i>   | Forward: 5'GCGCGCACCGGGTTA3'<br>Reverse: 5' TCACAAAACCTGAAGCCCGTCT 3'              |
| <i>Anp</i>       | Forward: 5' CCTGTGTACAGTGCCGGTGTC 3'<br>Reverse: 5' CCTAGAAGCACTGCCGTCTC 3'        |
| <i>Bnp</i>       | Forward: 5' CTGAAGGTGCTGTCCCAGAT 3'<br>Reverse: 5' GTTCTTTTGTGAGGCCTTGG 3'         |
| <i>Alpha-Mhc</i> | Forward: 5' GGTCCACATTCTTCAGGATTCTC 3'<br>Reverse: 5' GCGTTCCTTCTCTGACTTTTCG 3'    |
| <i>Beta-Mhc</i>  | Forward: 5' TCTCCTGCTGTTTCCTTACTTGCT 3'<br>Reverse: 5' CAGGCCTGTAGAAGAGCTGTACTC 3' |
| <i>Mcip1.4</i>   | Forward: 5' AGGGACTTTAGCTACAATTT 3'<br>Reverse: 5' TATGTTCTGAAGAGGGATTC 3'         |

**Supplementary Table 1.** List of primers used for mRNA quantification

| <b>Downregulated genes</b> | <b>Upregulated genes</b> |
|----------------------------|--------------------------|
| Arntl                      | Gm8649                   |
| Btnl9                      | Gm7816                   |
| Tbc1d4                     | Gm13141                  |
| Itgb3                      | Elovl1                   |
| ENSMUST00000139210         | NAP063041-1              |
| Sgk3                       | NAP121332-001            |
| Socs2                      | Bzw1                     |
| Alpk2                      | Cinp                     |
| Chd2                       | Cox16                    |
| Smim3                      | Setd5                    |
| Mmd                        | Gm5093                   |
| Sf3b1                      | Rpl35a-ps7               |
| Aqp4                       | Gm6621                   |
| Lrrc41                     | Rimkla                   |
| C230085N15Rik              | AK079655                 |
| Angpt1                     | TC1725193                |
| Sema6c                     | Gm11449                  |
| Nos1ap                     | Gm16490                  |
| Galnt18                    | A830080D01Rik            |
| Cd3eap                     | Ankrd29                  |
| Akap13                     | Gm7867                   |
| Tom112                     | ENSMUST00000141235       |
| BQ939345                   | Gm7634                   |
| Gm13251                    | Rpl17                    |
| Fam78b                     | Sdf4                     |
| Chd6                       | 4930506C21Rik            |
| Kat6b                      | Pcsk1n                   |
| Fitm2                      | Golga7b                  |
| Ceacam2                    | 2700060E02Rik            |
| N4bp2                      | Ccnd2                    |
| Rabgap11                   | Cdk7                     |
| Rcor3                      | BC051226                 |
| Satb1                      | Cflar                    |
| Orai3                      | NAP111477-1              |
| Slc38a1                    | Rpl17-ps8                |
| Atl2                       | Dst                      |
| Thns11                     | Gmcl1                    |
| Ncam1                      | Rpl14                    |
| Zfp646                     | Cyb5r4                   |
| LOC100862466               | Lcorl                    |
| Ablim2                     | Amot                     |
| Erc1                       | Mir99ahg                 |
| Bad                        | BC017158                 |
| 3110002H16Rik              | Gm31105                  |
| Crem                       | NAP111293-1              |
| Amph                       | Gm6272                   |
| Edn1                       | Serp1                    |
| Btnl9                      | Odc1                     |
| Prkeq                      | 4930512M02Rik            |
| Smco1                      | Otub2                    |
| Fam175b                    | Gm15843                  |
| Lrp3                       | NAP017864-001            |
| Fzd2                       | Bex1                     |

|                    |                    |
|--------------------|--------------------|
| Neurl4             | Icosl              |
| Prune              | Gm13194            |
| Ica1 variant 2     | Mapt               |
| Smad4              | Hsp90aa1           |
| H1f0               | Bcl2               |
| Kitl               | Gng12              |
| Tbc1d16            | Irf2bpl            |
| Zfp932             | Khdrbs1            |
| Npepps             | Smim8              |
| Pddc1              | Gm14231            |
| 4933431K23Rik      | A730020M07Rik      |
| Nudt7              | Kif1c              |
| Mx2                | Gm10161            |
| Aqr                | NAP102462-1        |
| L3mbtl3            | ENSMUST00000154604 |
| Pigh               | NAP069232-1        |
| Med24              | Tmem251            |
| 1700025G04Rik      | Lmo2               |
| Fam19a5            | Ehd4               |
| TC1601230          | 3110001N23Rik      |
| Exoc3l4            | Lamtor3            |
| Cdc27              | Gm5105             |
| D3Ert254e          | Inafm2             |
| Zmynd8             | 5730419F03Rik      |
| Lats2              | D7Wsu130e          |
| ENSMUST00000094300 | LOC102639982       |
| Acsl1              | Dkk3               |
| Ica1 variant 1     | Gm12988            |
| Garem              | Rarb               |
| Mief2              | Meig1              |
| Gnpda2             | Gm14816            |
| Slc25a37           | Lonrf1             |
| Dnajc28            | NAP026464-1        |
| Mtmr2              | Gm8075             |
| Eln                | Taf15              |
| Synpo2             | Nrn1               |
| Ilf2               | Gm14115            |
| Zfp868             | TC1779162          |
| H2afy              | Gm8317             |
| Atp2a2             | Cep112             |
| Fam122b            | Terc               |
| Zfp945             | Papln              |
| Hnrnpul1           | Tk1                |
| A630031M23Rik      | 4930517G19Rik      |
| Dnmt3b             | Cyp26b1            |
| Tjp2               | Itgam              |
| Stxbp2             | 2700022O18Rik      |
| Gys1               | Agmat              |
| Det1               | Fbxo24             |
| Gstm7              | Cpb2               |
| Twistnb            | Neurod2            |
| Ammecr1            | Figl1              |
| Car2               | Gm16982            |
| Arid3b             | Oxct2b             |



|               |         |
|---------------|---------|
| Nudt14        | Gm14322 |
| Nhej1         | Erv3    |
| Psme4         | Kctd11  |
| Atf7ip        | Wfdc6a  |
| Tcap          |         |
| Zfp275        |         |
| Stk19         |         |
| Tmem183a      |         |
| Map1lc3a      |         |
| B630005N14Rik |         |
| Pla2g6        |         |
| Ablim2        |         |
| Shisa5        |         |
| Rbfox1        |         |
| Tmem63b       |         |
| Mbtd1         |         |
| Depdc5        |         |
| Kctd5         |         |
| Mecr          |         |
| Gm8675        |         |
| Flywch1       |         |
| Igfbp4        |         |
| Tbc1d20       |         |
| Cyp4f17       |         |
| Zfp763        |         |
| Maob          |         |

**Supplementary Table 2.** List of all the differentially regulated genes in myocardium of AAV9-miR-212/132 treated hearts with doxorubicin compared to control.
